# Supplementary material for: Evaluation of the Antibacterial Activity of Eco-Friendly Hybrid Composites on the Base of Oyster Shell Powder Modified by Metal Ions and LLDPE
Source: MDPI journal article supplement (doi:10.3390/polym14153001), 2022-07-25
Supplement: s1 [file s1]

## SUPPORTING INFORMATION

### **Evaluation of the antibacterial activity of eco-friendly hybrid composites on the base of oyster shell powder modified by metal ions and LLDPE.**

**Januar Widakdo <sup>1</sup>, Tsan-Ming Chen <sup>2</sup>, Meng-Chieh Lin <sup>2</sup>, Jia-Hao Wu <sup>2</sup>, Tse-Ling Lin <sup>2</sup>,  
Pin-Ju Yu <sup>2</sup>, Wei-Song Hung <sup>1,3\*</sup> Kueir-Rarn Lee <sup>3\*</sup>**

<sup>1</sup>Advanced Membrane Materials Research Center, Graduate Institute of Applied Science and Technology, National Taiwan University of Science and Technology, Taipei, 106335, Taiwan.

<sup>2</sup> Carbide Division, Formosa Plastics Corporation, Taipei, 105076, Taiwan

<sup>3</sup> R&D Center for Membrane Technology, Department of Chemical Engineering, Chung Yuan University, Chung Li, 32023, Taiwan

\* Email: [wshung@mail.ntust.edu.tw](mailto:wshung@mail.ntust.edu.tw) and [krlee@cycu.edu.tw](mailto:krlee@cycu.edu.tw)

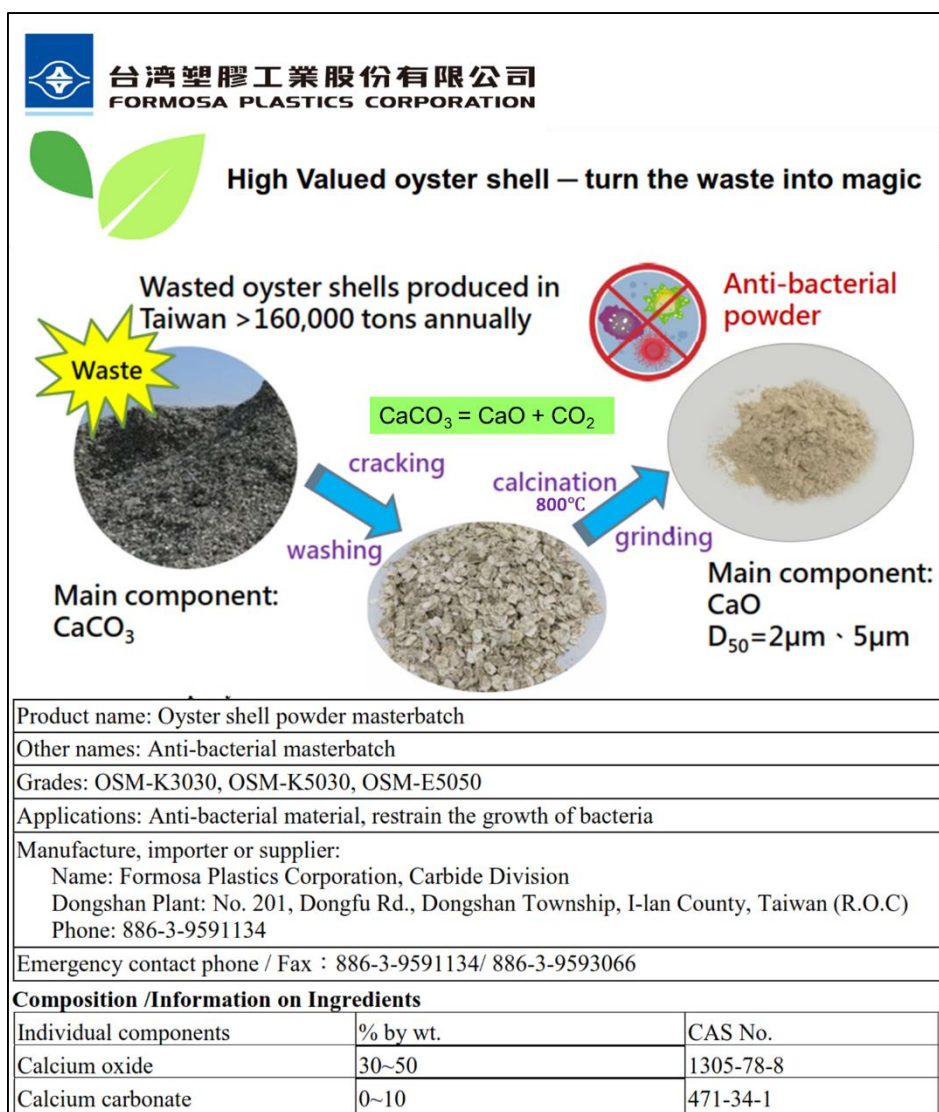

**Figure S1** Datasheet of oyster shell powder (OSP) masterbatch by Formosa plastics corporation

**Table S1.** Composition of LLDPE-3470 biocomposites.

| Sample name     | Composition  |            |               |               |               |
|-----------------|--------------|------------|---------------|---------------|---------------|
|                 | LLDPE (gram) | CaO (gram) | CaO-Ag (gram) | CaO-Zn (gram) | CaO-Cu (gram) |
| LLDPE-3470      | 100          | -          | -             | -             | -             |
| LLDPE/CaO 1%    | 99           | 1          | -             | -             | -             |
| LLDPE/CaO 2%    | 98           | 2          | -             | -             | -             |
| LLDPE/CaO Ag 1% | 99           | -          | 1             | -             | -             |
| LLDPE/CaO Ag 2% | 98           | -          | 2             | -             | -             |
| LLDPE/CaO Zn 1% | 99           | -          | -             | 1             | -             |
| LLDPE/CaO Zn 2% | 98           | -          | -             | 2             | -             |
| LLDPE/CaO Cu 1% | 99           | -          | -             | -             | 1             |
| LLDPE/CaO Cu 2% | 98           | -          | -             | -             | 2             |

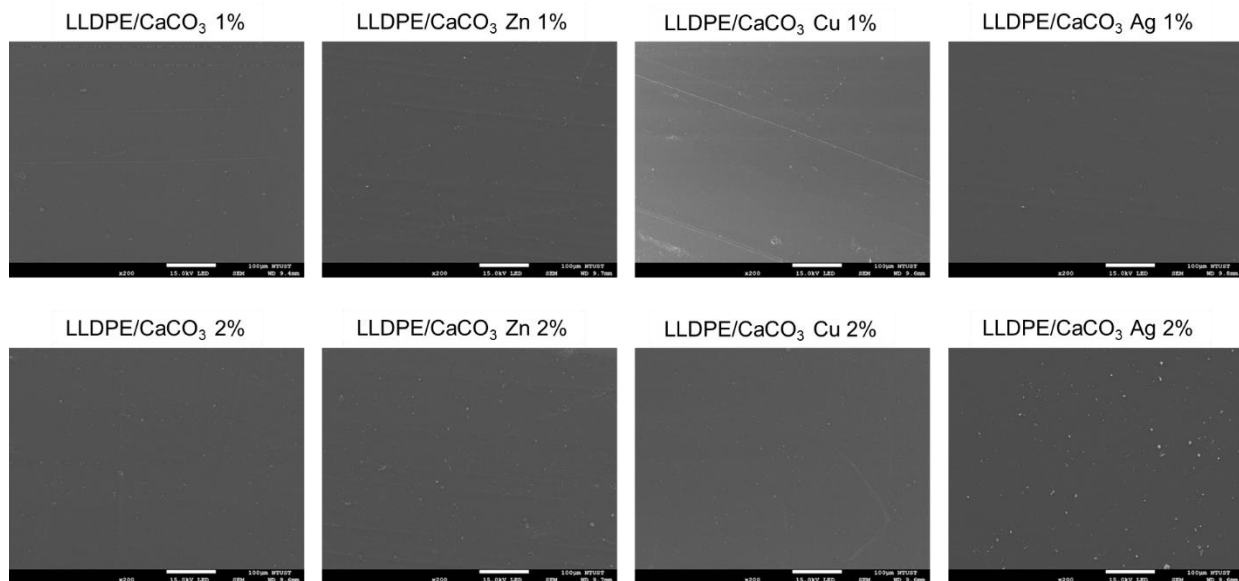

**Figure S2**, SEM surface image of polypropylene test pieces added with different concentrations prepared by calcium carbonate series modified metal ions

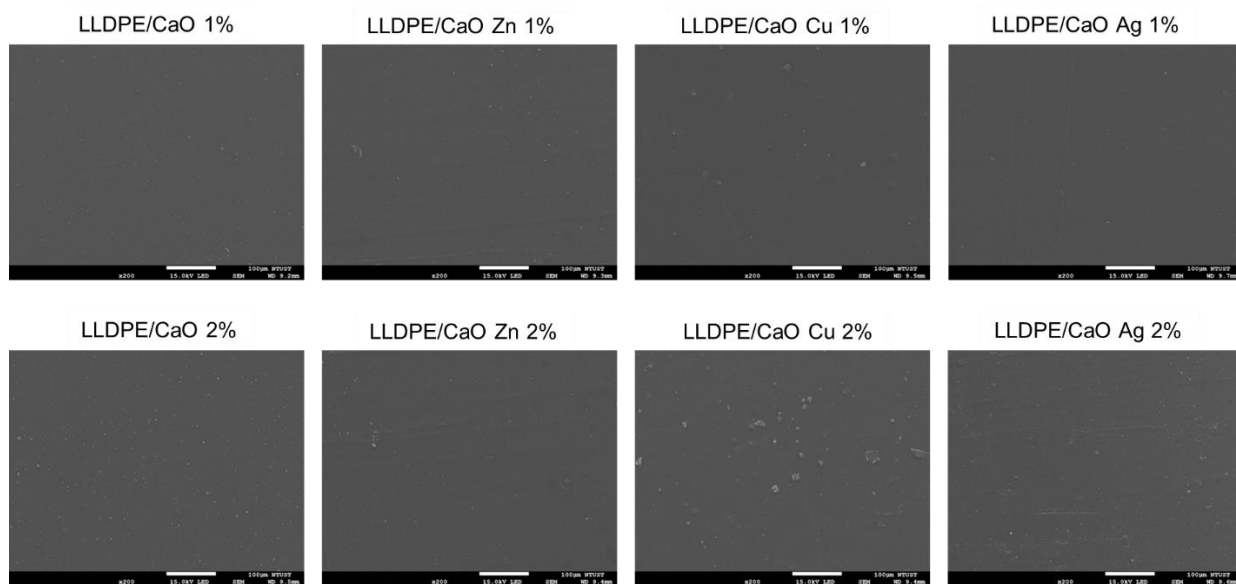

**Figure S3**, SEM surface image of polypropylene test pieces added with different concentrations prepared by calcium oxide series modified metal ions.



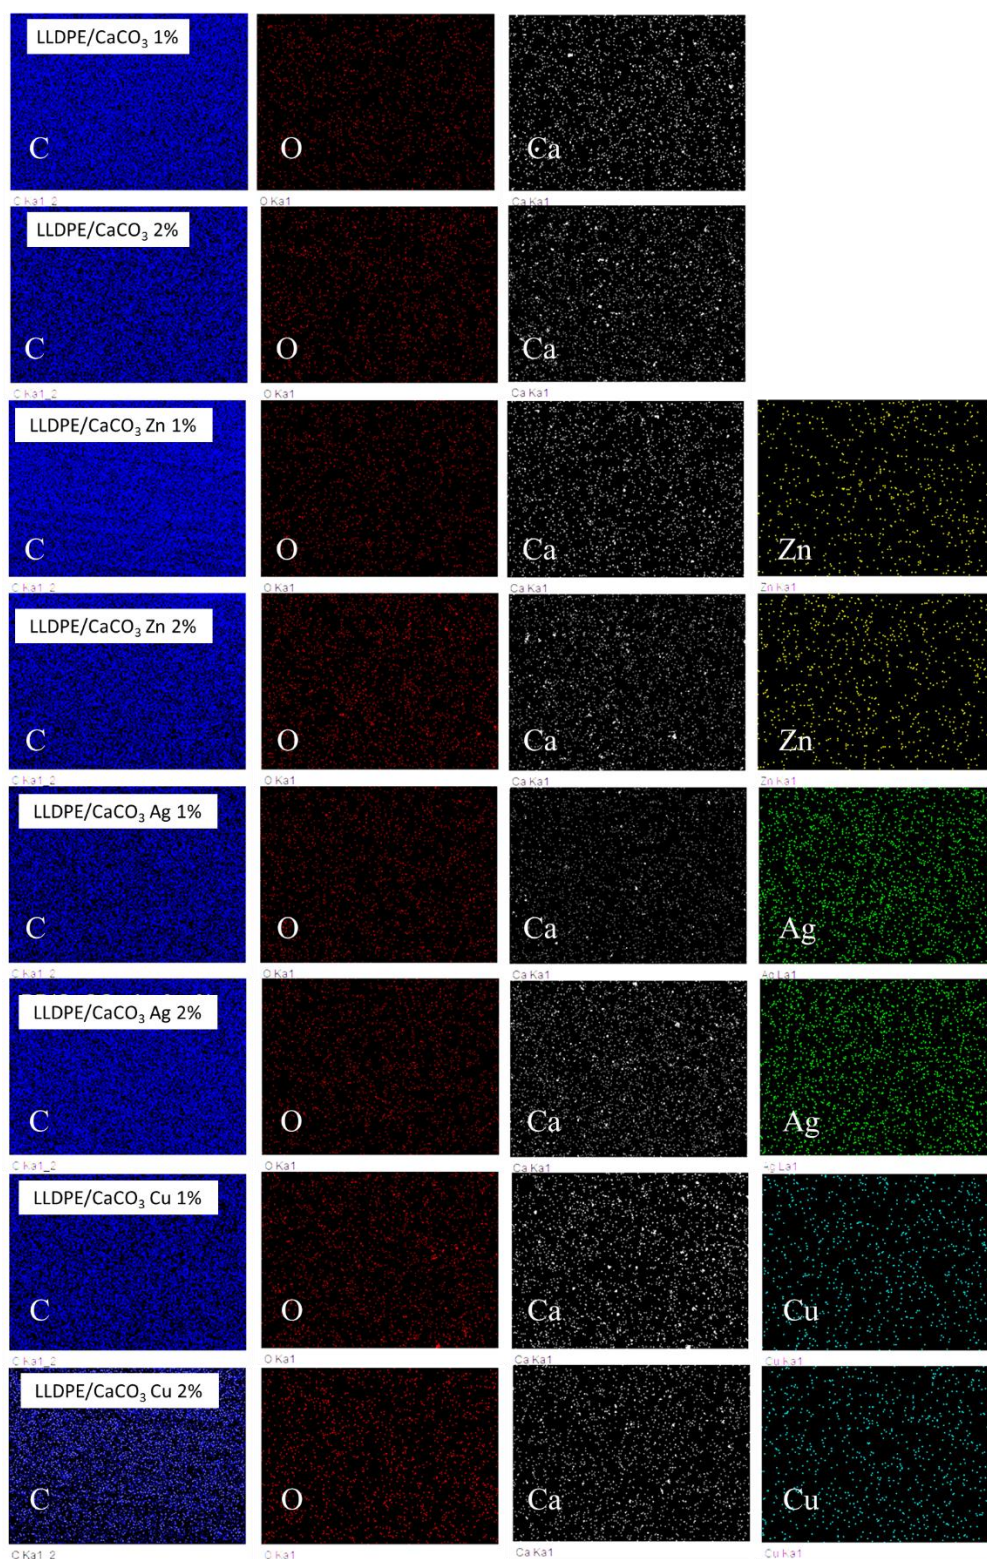

**Figure S4** EDX spectra of LLDPE/CaCO<sub>3</sub> and LLDPE/ CaCO<sub>3</sub> containing metal ions (Ag, Zn, Cu).

**Table S2.** SEM-EDX mapping elemental analysis of LLDPE added with different concentrations of  $\text{CaCO}_3$  series modified metal ions

| Sample                       | Atom (%) |      |      |          | Total |
|------------------------------|----------|------|------|----------|-------|
|                              | C        | O    | Ca   | Zn/Ag/Cu |       |
| LLDPE/ $\text{CaCO}_3$ 1%    | 98.14    | 1.30 | 0.57 | 0        | 100 % |
| LLDPE/ $\text{CaCO}_3$ 2%    | 97.49    | 2.09 | 0.42 | 0        | 100 % |
| LLDPE/ $\text{CaCO}_3$ Zn 1% | 98.57    | 1.18 | 0.16 | 0.10     | 100 % |
| LLDPE/ $\text{CaCO}_3$ Zn 2% | 97.95    | 1.47 | 0.36 | 0.23     | 100 % |
| LLDPE/ $\text{CaCO}_3$ Cu 1% | 98.38    | 1.21 | 0.29 | 0.11     | 100 % |
| LLDPE/ $\text{CaCO}_3$ Cu 2% | 97.83    | 1.46 | 0.52 | 0.25     | 100 % |
| LLDPE/ $\text{CaCO}_3$ Ag 1% | 98.38    | 1.41 | 0.14 | 0.12     | 100 % |
| LLDPE/ $\text{CaCO}_3$ Ag 2% | 97.86    | 1.59 | 0.36 | 0.24     | 100 % |

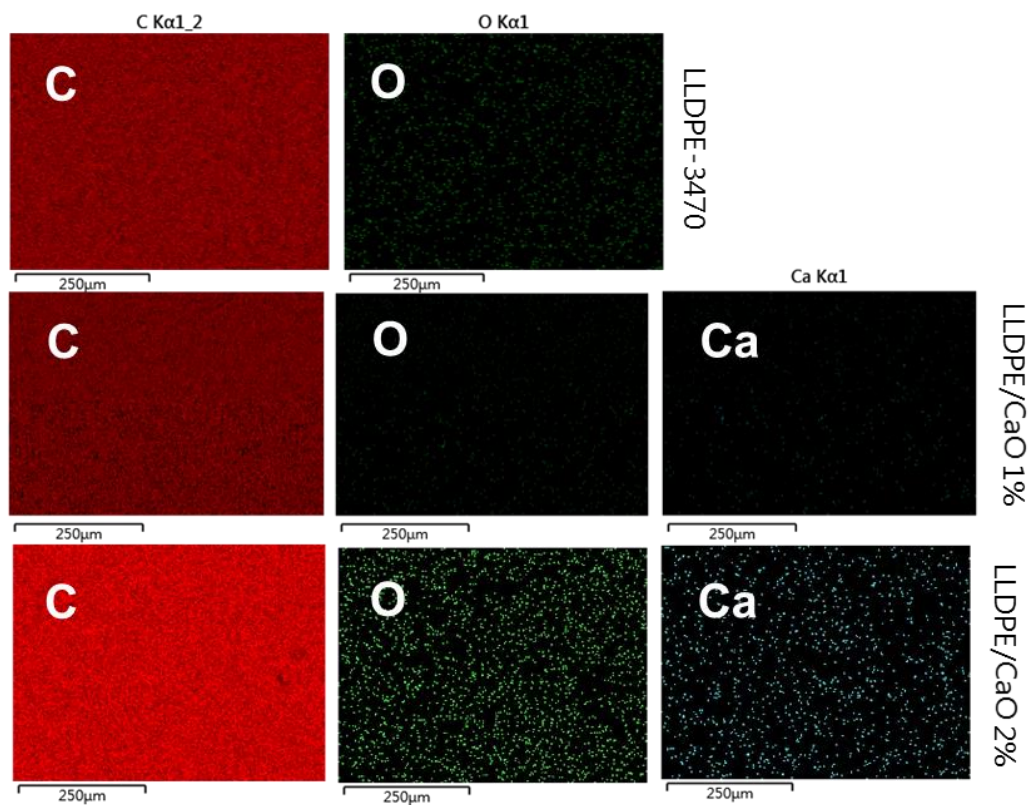

**Figure S5** EDX spectra of LLDPE-3470 and LLDPE/CaO with different concentrations (1% and 2%).

**Table S3.** The atomic percentage of LLDPE/CaO data from EDX measurement

| Sample       | Atom (%) |     |     |
|--------------|----------|-----|-----|
|              | C        | O   | Ca  |
| LLDPE-3470   | 99.4     | 0.6 | 0   |
| LLDPE/CaO 1% | 98.4     | 1.1 | 0.5 |
| LLDPE/CaO 2% | 97.6     | 1.6 | 0.8 |

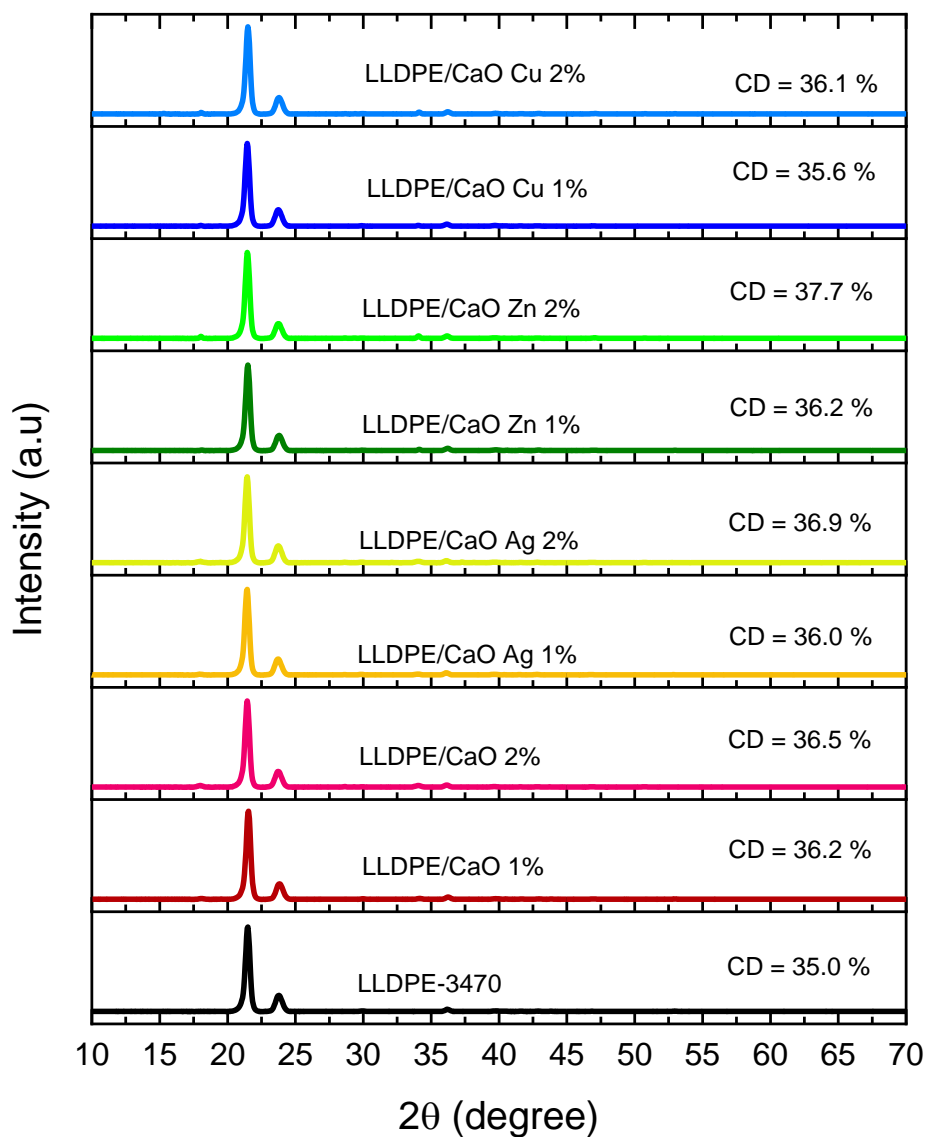

**Figure S6** XRD pattern of samples and degree of crystallinity (CD)

**Table S4.** Position of crystalline peaks and crystal indices for LLDPE and LLDPE nanocomposites with different ratios of CaO/Ag, Zn, Cu nanoparticles

| Sample          | Peak 2 $\theta$ (°) |       | FWHM $\beta$ |      | Crystallite Size (nm) |       | d-spacing (nm) |      | Degree of Crystallinity X (%) |
|-----------------|---------------------|-------|--------------|------|-----------------------|-------|----------------|------|-------------------------------|
|                 | 110                 | 220   | 110          | 220  | 110                   | 220   | 110            | 220  |                               |
| LLDPE           | 21.48               | 23.78 | 0.42         | 0.58 | 20.00                 | 14.66 | 4.13           | 3.74 | 35                            |
| LLDPE/CaO 1%    | 21.53               | 23.83 | 0.42         | 0.58 | 19.93                 | 14.71 | 4.12           | 3.73 | 36.2                          |
| LLDPE/CaO 2%    | 21.45               | 23.74 | 0.42         | 0.57 | 20.26                 | 14.96 | 4.14           | 3.74 | 36.5                          |
| LLDPE/CaO Ag 1% | 21.43               | 23.73 | 0.42         | 0.57 | 20.21                 | 14.84 | 4.14           | 3.75 | 36                            |
| LLDPE/CaO Ag 2% | 21.44               | 23.75 | 0.42         | 0.57 | 20.12                 | 14.90 | 4.14           | 3.74 | 36.9                          |
| LLDPE/CaO Zn 1% | 21.49               | 23.80 | 0.42         | 0.57 | 19.99                 | 14.78 | 4.13           | 3.74 | 35.6                          |
| LLDPE/CaO Zn 2% | 21.46               | 23.76 | 0.42         | 0.57 | 20.15                 | 14.89 | 4.14           | 3.74 | 36.1                          |
| LLDPE/CaO Cu 1% | 21.45               | 23.75 | 0.42         | 0.58 | 20.15                 | 14.64 | 4.14           | 3.74 | 36.2                          |
| LLDPE/CaO Cu 2% | 21.49               | 23.80 | 0.42         | 0.42 | 20.24                 | 20.32 | 4.13           | 3.74 | 37.7                          |

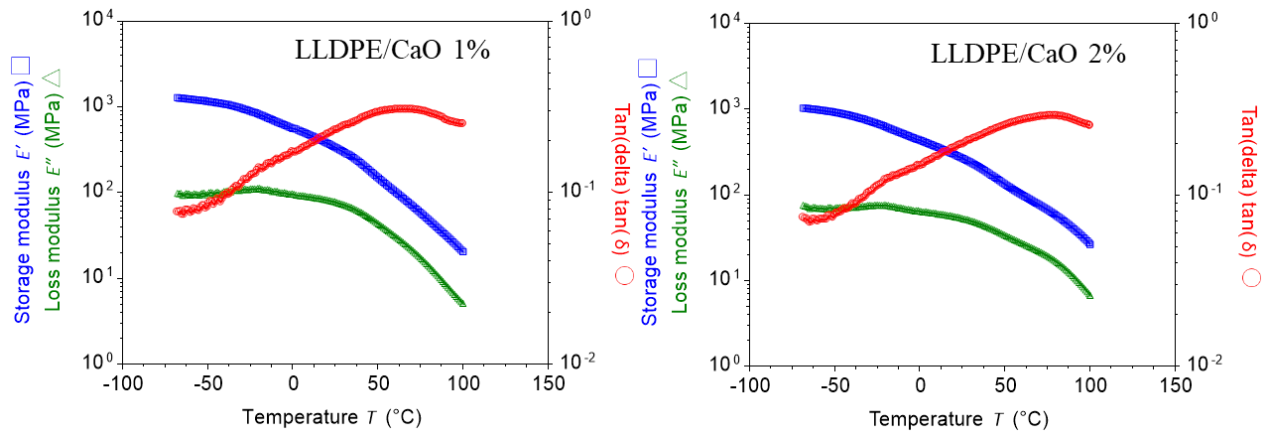

**Figure S7.** Typical DMA thermogram of LLDPE with different (%) of CaO. Storage Modulus ( $E'$ ) and Loss Modulus ( $E''$ ), and Loss Factor  $\tan(\delta)$  are plotted as a function of temperature.



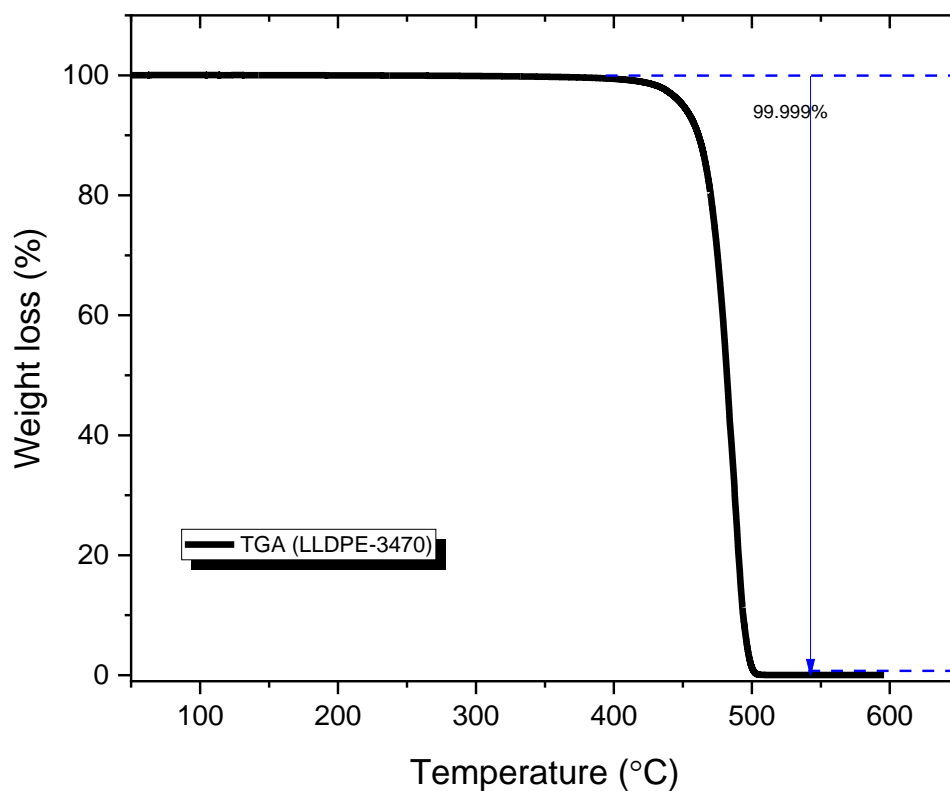

**Figure S8.** Thermogravimetric analysis (TGA) of LLDPE-3470.

**Table S5** Thermogravimetric analysis (TGA) analysis data of LLDPE and LLDPE biocomposites with different ratios of CaO/Ag, Zn, Cu nanoparticles

|                                         | <b>Sample</b>   | <b>Ash testing residue (%)</b> | <b>Mass loss (%)</b> |
|-----------------------------------------|-----------------|--------------------------------|----------------------|
| <b>Thermogravimetric analysis (TGA)</b> | LLDPE-3470      | 0.00                           | 99.999               |
|                                         | LLDPE/CaO 1%    | 0.85                           | 99.008               |
|                                         | LLDPE/CaO 2%    | 1.78                           | 98.077               |
|                                         | LLDPE/CaO Ag 1% | 0.66                           | 99.307               |
|                                         | LLDPE/CaO Ag 2% | 1.39                           | 98.211               |
|                                         | LLDPE/CaO Zn 1% | 0.72                           | 99.214               |
|                                         | LLDPE/CaO Zn 2% | 1.83                           | 98.487               |
|                                         | LLDPE/CaO Cu 1% | 0.53                           | 99.320               |
|                                         | LLDPE/CaO Cu 2% | 1.31                           | 98.440               |



**Table S6** antibacterial activity (*Escherichia coli* and *Staphylococcus aureus*) of powder CaO-Metal ions

| Materials | Antibacterial ring, Inhibition zone diameter (mm) |                              |
|-----------|---------------------------------------------------|------------------------------|
|           | <i>Escherichia coli</i>                           | <i>Staphylococcus aureus</i> |
| Control   | 32.00 ± 1.53                                      | 32.00 ± 2.08                 |
| CaO-Ag    | 22.00 ± 2.65                                      | 21.00 ± 1.53                 |
| CaO-Zn    | 29.00 ± 1.00                                      | 24.00 ± 2.08                 |
| CaO-Cu    | 23.00 ± 1.00                                      | 22.00 ± 2.65                 |

**Table S7** Antibacterial efficacy (%) *E.Coli* of LLDPE/CaO 1% and LLDPE/CaO 2% with a deferent metal ion.

|                                   | Materials |        |              |        |              |        |              |        |
|-----------------------------------|-----------|--------|--------------|--------|--------------|--------|--------------|--------|
|                                   | LLDPE/CaO |        | LLDPE/CaO Ag |        | LLDPE/CaO Zn |        | LLDPE/CaO Cu |        |
|                                   | 1%        | 2%     | 1%           | 2%     | 1%           | 2%     | 1%           | 2%     |
| <b>Antibacterial efficacy (%)</b> | 90.60 ±   | 99.5 ± | 99.9 ±       | 99.9 ± | 81 ±         | 98.5 ± | 82.7 ±       | 99.9 ± |
| <i>E.Coli</i>                     | 1.15      | 0.46   | 0.49         | 0.15   | 1.15         | 1.15   | 1.53         | 0.10   |

**Table S8.** Classification antimicrobial sensitivity[1, 2]

| Diameter Zone of inhibition (mm) | Antimicrobial activity |
|----------------------------------|------------------------|
| ≤ 10                             | Not active             |
| 11-15                            | Weak                   |
| 16-20                            | Middle                 |
| ≥ 20                             | Strong                 |

## References

1. Indriani, V., et al., *Antibacterial Effect of Curcuma zedoaria Extract on Bacillus cereus and Staphylococcus epidermidis*. Althea Medical Journal, 2020. **7**(1): p. 6-10.
2. Zainuddin, A. and A.H. Saputro. *Antimicrobial effectiveness measurement system based on circle detection algorithm*. in *2017 International Seminar on Sensors, Instrumentation, Measurement and Metrology (ISSIMM)*. 2017. IEEE.

## Parametric and Non-parametric tests

### Analysis of variance (ANOVA) of LLDPE/CaO-Metal ion biocomposites.

| Anova: Single Factor |          |       |          |          |          |          |
|----------------------|----------|-------|----------|----------|----------|----------|
| SUMMARY              |          |       |          |          |          |          |
| Groups               | Count    | Sum   | Average  | Variance |          |          |
| LLDPE/CaO 1%         | 3        | 270.3 | 90.1     | 1.33     |          |          |
| LLDPE/CaO 2%         | 3        | 298.5 | 99.5     | 0.21     |          |          |
| LLDPE/CaO Ag 1%      | 3        | 299.7 | 99.9     | 0.01     |          |          |
| LLDPE/CaO Ag 2%      | 3        | 299.7 | 99.9     | 0.01     |          |          |
| LLDPE/CaO Zn 1%      | 3        | 243   | 81       | 0.25     |          |          |
| LLDPE/CaO Zn 2%      | 3        | 295.5 | 98.5     | 0.25     |          |          |
| LLDPE/CaO Cu 1%      | 3        | 248.2 | 82.73333 | 2.413333 |          |          |
| LLDPE/CaO Cu 2%      | 3        | 299.7 | 99.9     | 0.01     |          |          |
| ANOVA                |          |       |          |          |          |          |
| Source of Variation  | SS       | df    | MS       | F        | P-value  | F crit   |
| Between Groups       | 1398.152 | 7     | 199.736  | 356.4062 | 2.38E-16 | 2.657197 |
| Within Groups        | 8.966667 | 16    | 0.560417 |          |          |          |
| Total                | 1407.118 | 23    |          |          |          |          |

### Nonparametric Kruskal-Wallis Test of LLDPE/CaO-Metal ion biocomposites.

| LLDPE/CaO<br>1% | LLDPE/CaO<br>2% | LLDPE/CaO<br>Ag 1% | LLDPE/CaO<br>Ag 2% | LLDPE/CaO<br>Zn 1% | LLDPE/CaO<br>Zn 2% | LLDPE/CaO<br>Cu 1% | LLDPE/CaO<br>Cu 2% |
|-----------------|-----------------|--------------------|--------------------|--------------------|--------------------|--------------------|--------------------|
| 89              | 99              | 99.8               | 99.9               | 81                 | 99                 | 84                 | 99.8               |
| 91.3            | 99.9            | 99.9               | 99.8               | 80.5               | 98                 | 81                 | 99.9               |
| 90              | 99.6            | 100                | 100                | 81.5               | 98.5               | 83.2               | 100                |

$$H = \left[ \frac{12}{n_T(n_T + 1)} \sum_{i=1}^k \frac{R_i^2}{n_i} \right] - 3(n_T + 1)$$

$k$  = number of populations  
 $n_i$  = the number of observations in sample  $i$   
 $n_T = \sum_{i=1}^k n_i$  = the total number of observations in all samples  
 $R_i$  = the sum of the ranks for sample  $i$

|                   |          |                                                   |
|-------------------|----------|---------------------------------------------------|
| <b>H</b>          | 20.46    | <b>Nonparametric Methods, Kruskal-Wallis Test</b> |
| <b>chi-square</b> | 5.99     |                                                   |
| <b>p-value</b>    | 3.60E-05 |                                                   |

### Analysis of variance (ANOVA) of CaO-Metal ion powder for *E.Coli* bacterial.

|                      |       |     |         |          |          |          |
|----------------------|-------|-----|---------|----------|----------|----------|
| Anova: Single Factor |       |     |         |          |          |          |
| SUMMARY              |       |     |         |          |          |          |
| Groups               | Count | Sum | Average | Variance |          |          |
| CaO Ag (E.Coli)      | 3     | 66  | 22      | 7        |          |          |
| CaO Zn (E.Coli)      | 3     | 87  | 29      | 1        |          |          |
| CaO Cu (E.Coli)      | 3     | 69  | 23      | 4        |          |          |
| ANOVA                |       |     |         |          |          |          |
| Source of Variation  | SS    | df  | MS      | F        | P-value  | F crit   |
| Between Groups       | 86    | 2   | 43      | 10.75    | 0.010386 | 5.143253 |
| Within Groups        | 24    | 6   | 4       |          |          |          |
| Total                | 110   | 8   |         |          |          |          |

### Nonparametric Kruskal-Wallis Test of CaO-Metal ion powder for *E.Coli* bacterial.

| CaO Ag<br>(E.Coli)                                                                                                                                                                                                                                                                                                                                                                     | CaO Zn<br>(E.Coli) | CaO Cu<br>(E.Coli) |
|----------------------------------------------------------------------------------------------------------------------------------------------------------------------------------------------------------------------------------------------------------------------------------------------------------------------------------------------------------------------------------------|--------------------|--------------------|
| 20                                                                                                                                                                                                                                                                                                                                                                                     | 29                 | 21                 |
| 21                                                                                                                                                                                                                                                                                                                                                                                     | 30                 | 23                 |
| 25                                                                                                                                                                                                                                                                                                                                                                                     | 28                 | 25                 |
| $H = \left[ \frac{12}{n_T(n_T + 1)} \sum_{i=1}^k \frac{R_i^2}{n_i} \right] - 3(n_T + 1)$ <p> <math>k</math> = number of populations<br/> <math>n_i</math> = the number of observations in sample <math>i</math><br/> <math>n_T = \sum_{i=1}^k n_i</math> = the total number of observations in all samples<br/> <math>R_i</math> = the sum of the ranks for sample <math>i</math> </p> |                    |                    |
| <b>H</b>                                                                                                                                                                                                                                                                                                                                                                               | 5.60               |                    |
| <b>chi-square</b>                                                                                                                                                                                                                                                                                                                                                                      | 5.99               |                    |
| <b>p-value</b>                                                                                                                                                                                                                                                                                                                                                                         | 0.06               |                    |



### Analysis of variance (ANOVA) of CaO-Metal ion powder for *S. Aureus* bacterial.

| Anova: Single Factor |          |     |          |          |          |          |
|----------------------|----------|-----|----------|----------|----------|----------|
| SUMMARY              |          |     |          |          |          |          |
| Groups               | Count    | Sum | Average  | Variance |          |          |
| CaO Ag (S. Aureus)   | 3        | 64  | 21.33333 | 2.333333 |          |          |
| CaO Zn (S. Aureus)   | 3        | 73  | 24.33333 | 2.333333 |          |          |
| CaO Cu (S. Aureus)   | 3        | 66  | 22       | 1        |          |          |
|                      |          |     |          |          |          |          |
| ANOVA                |          |     |          |          |          |          |
| Source of Variation  | SS       | df  | MS       | F        | P-value  | F crit   |
| Between Groups       | 14.88889 | 2   | 7.444444 | 3.941176 | 0.080735 | 5.143253 |
| Within Groups        | 11.33333 | 6   | 1.888889 |          |          |          |
| Total                | 26.22222 | 8   |          |          |          |          |

### Nonparametric Kruskal-Wallis Test of CaO-Metal ion powder for *S. Aureus* bacterial.

| CaO Ag<br>(S.Aureus)                                                                                                                                                                                                                                                                                                                                                                   | CaO Zn<br>(S. Aureus) | CaO Cu<br>(S. Aureus) |
|----------------------------------------------------------------------------------------------------------------------------------------------------------------------------------------------------------------------------------------------------------------------------------------------------------------------------------------------------------------------------------------|-----------------------|-----------------------|
| 20                                                                                                                                                                                                                                                                                                                                                                                     | 26                    | 21                    |
| 23                                                                                                                                                                                                                                                                                                                                                                                     | 23                    | 23                    |
| $H = \left[ \frac{12}{n_T(n_T + 1)} \sum_{i=1}^k \frac{R_i^2}{n_i} \right] - 3(n_T + 1)$ <p> <math>k</math> = number of populations<br/> <math>n_i</math> = the number of observations in sample <math>i</math><br/> <math>n_T = \sum_{i=1}^k n_i</math> = the total number of observations in all samples<br/> <math>R_i</math> = the sum of the ranks for sample <math>i</math> </p> |                       |                       |
| <b>H</b>                                                                                                                                                                                                                                                                                                                                                                               | 4.47                  |                       |
| <b>chi-square</b>                                                                                                                                                                                                                                                                                                                                                                      | 5.99                  |                       |
| <b>p-value</b>                                                                                                                                                                                                                                                                                                                                                                         | 0.11                  |                       |
